# Supplementary material
Source: PubMed Central journal article supplement (PMC3689995)
Supplement: supp_M112.446591_jbc.M112.446591-1.pdf [file supp_M112.446591_jbc.M112.446591-1.pdf]

## SUPPLEMENTAL TABLES

**Table S1.** Targeting sequences of shRNAs

| Gene                | Clone ID       | Target sequences       |
|---------------------|----------------|------------------------|
| Human Smad2 shRNA-1 | TRCN0000010477 | CAAGTACTCCTTGCTGGATTG  |
| Human Smad2 shRNA-2 | TRCN0000040037 | CCTAAGTGATAGTGCAATCTT  |
| Human Smad3 shRNA-1 | TRCN0000020010 | CCGCTGTTCCAGTGTGTCTTA  |
| Human Smad3 shRNA-2 | TRCN0000020013 | GAGCCTGGTCAAGAACTCAA   |
| Mouse Smad2 shRNA-1 | TRCN0000089334 | CGGTTAGATGAGCTTGAGAAA  |
| Mouse Smad2 shRNA-2 | TRCN0000089335 | CCACTGTAGAAATGACAAGAA  |
| Mouse Smad3 shRNA-1 | TRCN0000089026 | CTGTCCAATGTCAACCGGAAT  |
| Mouse Smad3 shRNA-2 | TRCN0000089027 | CATCCGTATGAGCTTCGTCAA  |
| Human Cdx2 shRNA-1  | TRCN0000013683 | GCTGAATGTATGTCAGTGCTA  |
| Human Cdx2 shRNA-2  | TRCN0000013684 | CCGCAGAGCAAAGGAGAGGAA  |
| Mouse Nanog shRNA   |                | GTAGCTCAGATATGCAATA    |
| Non-targeting shRNA |                | ATCTCGCTTGGGCGAGAGTAAG |

**Table S2.** Primer sequences for qRT-PCR and chromatin immunoprecipitation (ChIP)

| Gene                   | Forward                         | Reverse                         |
|------------------------|---------------------------------|---------------------------------|
| <b>Mouse (qRT-PCR)</b> |                                 |                                 |
| Sox17                  | CAACGCAGAGCTAAGCAAGATG          | CACGAAGGGCCGCTTCT               |
| Brachyury              | CTGGGAGCTCAGTTCTTTTCA           | GAGGACGTGGCAGCTGAGA             |
| Tuj1                   | TAG ACC CCA GCG GCA ACT AT      | GTT CCA GGT TCC AAG TCC ACC     |
| Cdx2                   | GCCACCATGTACGTGAGCTAC           | GTCACCTGGGTGACAGTGGAGT          |
| FoxA2                  | CCAGCAGAGCCCCAACAA              | AGGGAAGAGGTCCATGATCCA           |
| GATA4                  | CAGCCTGCCTGGACGG                | GCCTTCTGAGAAGTCATCAAACATAT      |
| Blimp1                 | TTCTCTTGAAAAACGTGTGGG           | GGAGCCGGAGCTAGACTTG             |
| PRDM14                 | AGTCCAGGACAAGGCGAA              | GTGGTGGCGAGGTTCTCTAA            |
| Oct4                   | AGTCTGGAGACCATGTTTCTGAAGT       | TACTCTTCTCGTTGGGAATACTCAATA     |
| Nanog                  | CCTCAGCCTCCAGCAGATGC            | CCGCTTGCACCTTCACCCTTTG          |
| Smad2                  | AAGCCATCACCCTCAGAATTG           | CACTGATCTACCGTATTTGCTGT         |
| Smad3                  | AGGGGCTCCCTCACGTTATC            | CATGGCCCCTAATTCATGGTG           |
| <b>Human (qRT-PCR)</b> |                                 |                                 |
| Oct4                   | CTTGAATCCCGAATGGAAAGGG          | GTGTATATCCCAGGGTGATCCTC         |
| Nanog                  | CATGAGTGTGGATCCAGCTTG           | CCTGAATAAGCAGATCCATGG           |
| Sox17                  | GTGGACCGCACGGAATTTG             | GGAGATTCACACCGGAGTCA            |
| FoxA2                  | GGAGCAGCTACTATGCAGAGC           | CGTGTTTCATGCCGTTTCATCC          |
| Gata4                  | CGACACCCCAATCTCGATATG           | GTTGCACAGATAGTGACCCGT           |
| CER                    | GGATGGCCGCCAGAATCAG             | TGGCACTGCGACAAACAGAT            |
| Brachyury              | TGCTTCCCTGAGACCCAGTT            | GATCACTTCTTTCTTTGCATCAAG        |
| Tuj1                   | GGCCAAGGGTCACTACACG             | GCAGTCGCAGTTTTTCACTC            |
| Cdx2                   | GGGCTCTCTGAGAGGCAGGT            | CCTTTGCTCTGCGGTTCTG             |
| Dlx3                   | CTC GCC CAA GTC GGA ATA TAC     | CTG GTA GCT GGA GTA GAT CGT     |
| Hand1                  | GAG AGC ATT AAC AGC GCA TTC G   | CAC GTC CAT CAG GTA GGC G       |
| Msx2                   | GCA GAG CGT GCA GAG TTC T       | GGC AGC ATA GGT TTT GCA GC      |
| KDR                    | AAG GTG ACA GGA AAA GAC GAA CT  | TCC CCT CCA TTG GCC CGC TTA AC  |
| MHC                    | CCCTACAAGTGGTTGCCAGTG           | CTTCCCTGCGCCAGATTCTC            |
| Rux2                   | TGGTTACTGTCATGGCGGGTA           | TCTCAGATCGTTGAACCTTGCTA         |
| Nestin                 | GAA ACA GCC ATA GAG GGC AAA     | TGG TTT TCC AGA GTC TTC AGT GA  |
| Sox1                   | CAG TAC AGC CCC ATC TCC AAC     | GCG GGC AAG TAC ATG CTG A       |
| Smad2                  | ATGTCGTCCATCTTGCCATTC           | CTCAAGCTCATCTAATCGTCCTG         |
| Smad3                  | TGGACGCAGGTTCTCCAAAC            | CCGGCTCGCAGTAGGTAAC             |
| RPL19                  | ATGTATCACAGCCTGTACCTG           | TTCTTGGTCTCTTCCTC- CTTG         |
| <b>ChIP</b>            |                                 |                                 |
| Nanog                  | CCC ACC TAG TCT GGG TTA CTC TGC | ACC CAC CCT TGT GAA TTC TCA GTT |
| Smad7                  | GAA ACC CGA TCT GTT GTT TGC     | CTC TGC TCG GCT GGT TCC AC      |
| Nanog N.C.             | GGC CTT CCA GCC ACC AGC C       | CCA TCC CCC GCT CCC TGT CC      |
| Smad7 N.C.             | GAC CAG AGA CTC CCC TAA AC      | CTT CCT CTC CTT TTC TTC TGC     |
